# Supplementary material for: A hydrolytically stable europium–organic framework for the selective detection of radioactive Th4+ in aqueous solution
Source: Royal Society of Chemistry journal article supplement (doi:10.1039/c9ce00241c), 2019-01-01
Supplement: c9ce00241c1.pdf [file c9ce00241c1.pdf]

## Supporting information for

# **A hydrolytically stable europium–organic framework for the selective detection of radioactive Th<sup>4+</sup> in aqueous solution**

Liping Song,<sup>§a,b</sup> Wei Liu,<sup>§b</sup> Yanlong Wang,<sup>b</sup> Lanhua Chen,<sup>b</sup> Xiao-Feng Wang<sup>\*a</sup> and Shuao Wang<sup>\*b</sup>

<sup>a</sup>School of Chemistry and Chemical Engineering, and Hunan Province Engineering Research Center of Radioactive Control Technology in Uranium Mining and Metallurgy, University of South China, Hengyang, 421001, China.

<sup>b</sup>School for Radiological and Interdisciplinary Sciences (RAD-X) and Collaborative Innovation Center of Radiation Medicine of Jiangsu Higher Education Institutions, Soochow University, 199 Ren'ai Road, Suzhou 215123, China.

## **Contents**

### **S1. Crystallographic data**

### **S2. Stability test**

### **S3. The TGA curve for Compound 1**

### **S4. The excitation spectra of Compound 1**

### **S5. Influence of competing metal ions**

### **S6. The influence of the pH value on the luminescence intensity of compound 1**

### **S7. Emission spectra of deionized water**

### **S8. The linear relationship the relative decrease of luminescence intensity and thorium concentration of Compound 1 in low concentration**

### **S9. Adsorption ratio of Th<sup>4+</sup> in $2.15 \times 10^{-5}$ mol/L competing metal ions.**

## S1. Crystallographic data of Compound 1

**Table S1.** Crystallographic data and structural refinement for **compound 1**

| Sample                                                                                                | Compound 1                                                                     |
|-------------------------------------------------------------------------------------------------------|--------------------------------------------------------------------------------|
| Formula                                                                                               | C <sub>26</sub> H <sub>26</sub> O <sub>18</sub> N <sub>2</sub> Eu <sub>2</sub> |
| <i>Mr</i> [g·mol <sup>-1</sup> ]                                                                      | 958.43                                                                         |
| Crystal system                                                                                        | triclinic                                                                      |
| Space group                                                                                           | <i>P</i> -1                                                                    |
| <i>a</i> (Å)                                                                                          | 9.1075(8)                                                                      |
| <i>b</i> (Å)                                                                                          | 11.8822(11)                                                                    |
| <i>c</i> (Å)                                                                                          | 15.5502(14)                                                                    |
| $\alpha$                                                                                              | 80.532(3)                                                                      |
| $\beta$                                                                                               | 74.179(3)                                                                      |
| $\gamma$                                                                                              | 74.763(3)                                                                      |
| <i>V</i> (Å <sup>3</sup> )                                                                            | 1554.3(2)                                                                      |
| <i>Z</i>                                                                                              | 2                                                                              |
| <i>D<sub>c</sub></i> (g cm <sup>-3</sup> )                                                            | 2.048                                                                          |
| $\mu$ (mm <sup>-1</sup> )                                                                             | 4.084                                                                          |
| <i>F</i> (000)                                                                                        | 932.0                                                                          |
| T(K)                                                                                                  | 296                                                                            |
| GOF on <i>F</i> <sup>2</sup>                                                                          | 1.054                                                                          |
| <i>R</i> <sub>1</sub> , <sup>a</sup> <i>wR</i> <sub>2</sub> <sup>b</sup> ( <i>I</i> > 2σ( <i>I</i> )) | 0.0282, 0.0712                                                                 |
| <i>R</i> <sub>1</sub> , <sup>a</sup> <i>wR</i> <sub>2</sub> <sup>b</sup> (all data)                   | 0.0311, 0.0729                                                                 |

$$^a R_1 = \sum(F_o - F_c) / \sum F_o; \quad ^b wR_2 = [\sum w(F_o^2 - F_c^2)^2 / \sum w(F_o^2)^2]^{1/2}$$

**Table S2.** Selected bond lengths (Å)

| Selected Bond Lengths (Å) |          |
|---------------------------|----------|
| Eu1-O4                    | 2.381(3) |
| Eu1-O6                    | 2.301(3) |
| Eu1-O7                    | 2.309(3) |
| Eu1-O8                    | 2.449(3) |
| Eu1-O11                   | 2.390(2) |
| Eu1-O13                   | 2.337(2) |
| Eu1-O15                   | 2.375(2) |
| Eu2-O5                    | 2.346(3) |
| Eu2-O9                    | 2.365(2) |
| Eu2-O10A                  | 2.806(3) |
| Eu2-O12                   | 2.303(2) |
| Eu2-O14                   | 2.454(3) |
| Eu2-O16                   | 2.349(2) |
| Eu2-O17                   | 2.386(2) |

## S2. Stability test

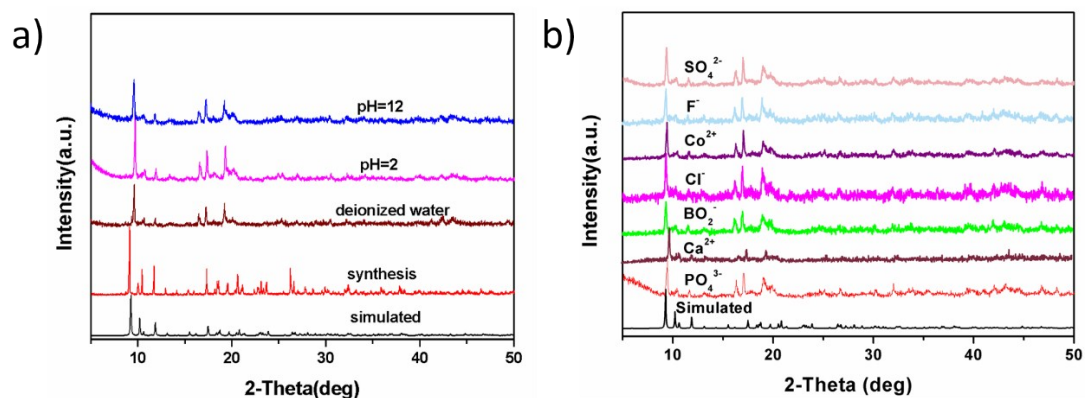

**Figure S1.** a) The stability of **Compound 1** in deionized water, pH =2, and 12 aqueous solutions. b) The stability of **Compound 1** in cation and anion solutions.

## S3. The TGA curve for Compound 1

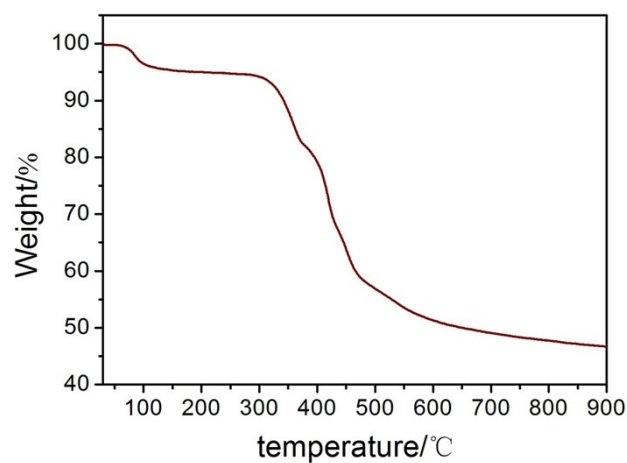

**Figure S2.** The TGA curve of **Compound 1** measured from 30 °C to 900 °C.

## S4. The excitation spectrum of Compound 1

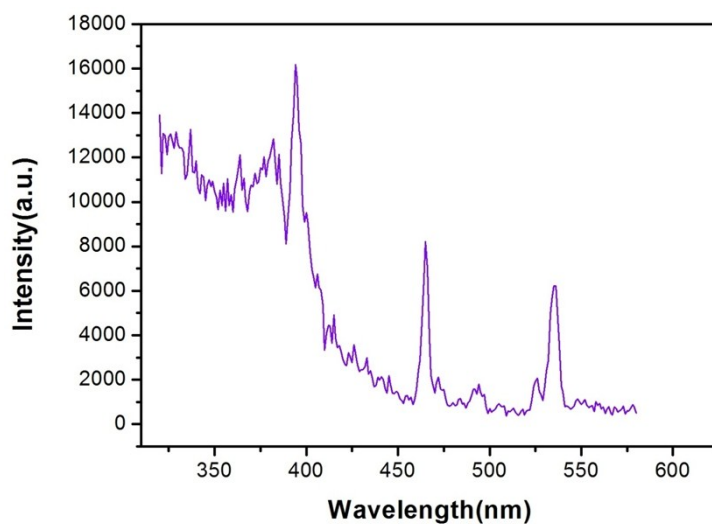

**Figure S3.** The excitation spectrum of **Compound 1**.

### S5. Influence of competing ions

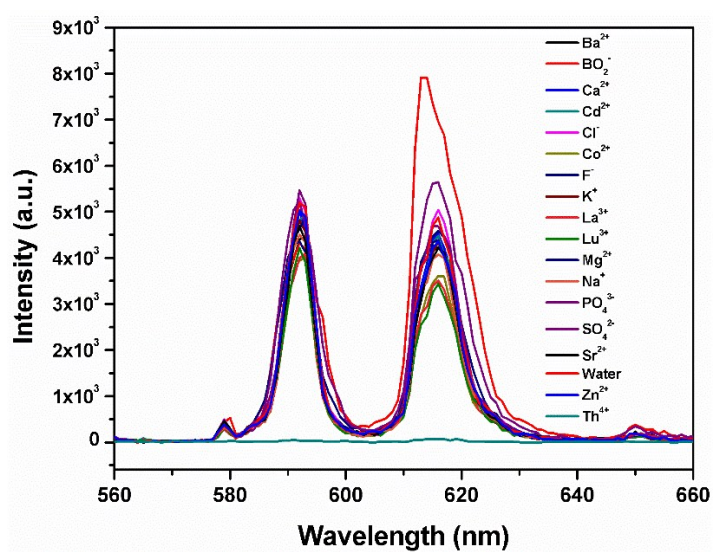

**Figure S4.** Emission spectra of **compound 1** immersed in different cation and anion solutions.

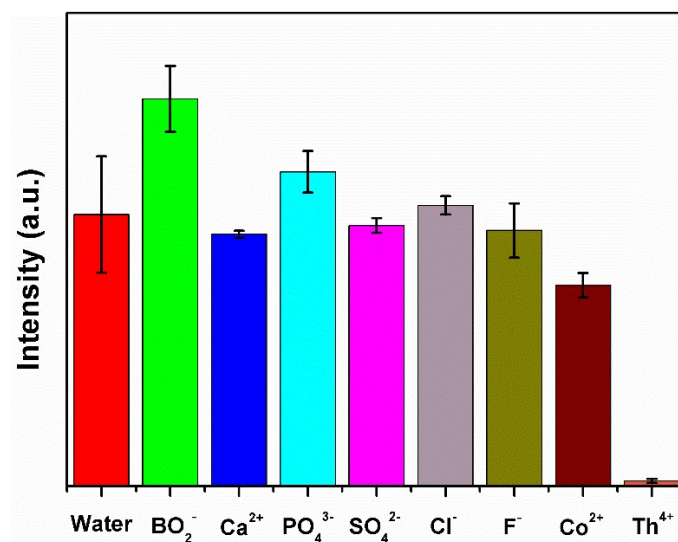

**Figure S5.** Luminescence intensity of **compound 1** immersed in  $1 \times 10^{-3}$  mol/L various ion solutions. (monitored at 616 nm, and excited at 290 nm)

**S6. The influence of the pH value on the luminescence intensity of compound 1**

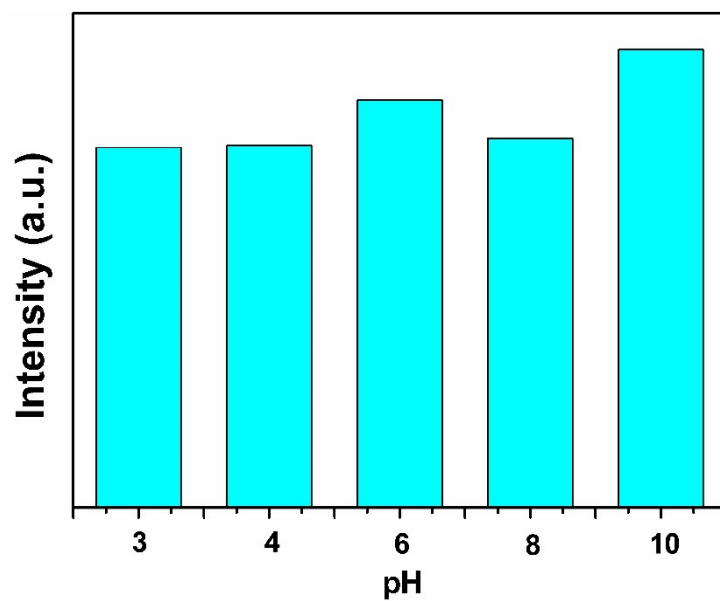

**Figure S6.** The influence of the pH value on the luminescence intensity of compound 1 (monitored at 616 nm).

### S7. Emission spectra of deionized water

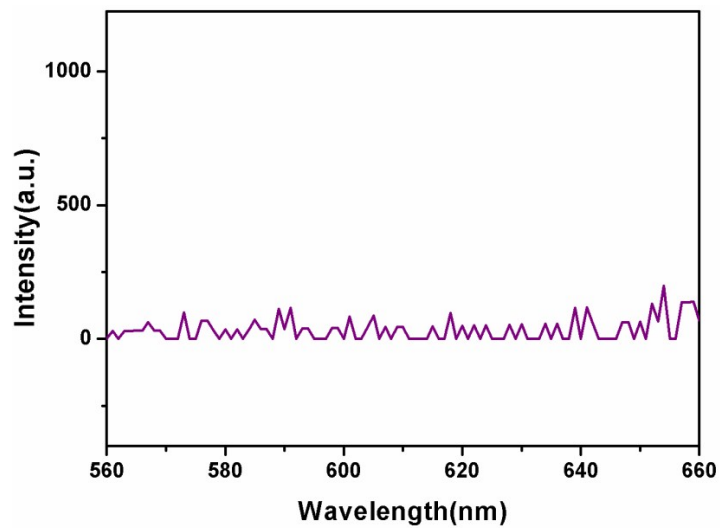

**Figure S7.** Emission spectra of deionized water (excited at 290 nm).

**S8. The linear relationship the relative decrease of luminescence intensity and thorium concentration of compound 1 in low concentration**

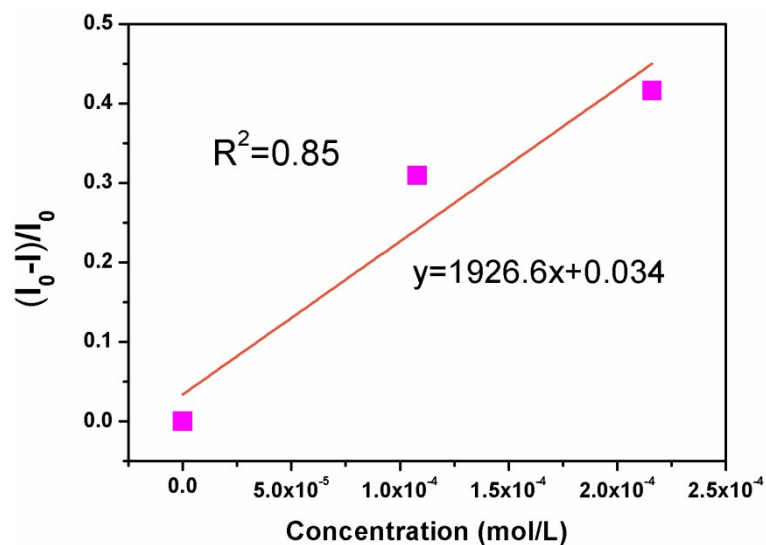

**Figure S8.** A plot showing the relative decrease of luminescence intensity (measured at 616 nm) of **compound 1**, the data points in low concentration ( $0 - 2.16 \times 10^{-4}$  mol/L) are fitted in linear relationship ( $R^2 = 0.85$ ).

**S9. Adsorption ratio of Th<sup>4+</sup> in  $2.15 \times 10^{-5}$  mol/L competing metal ions.**

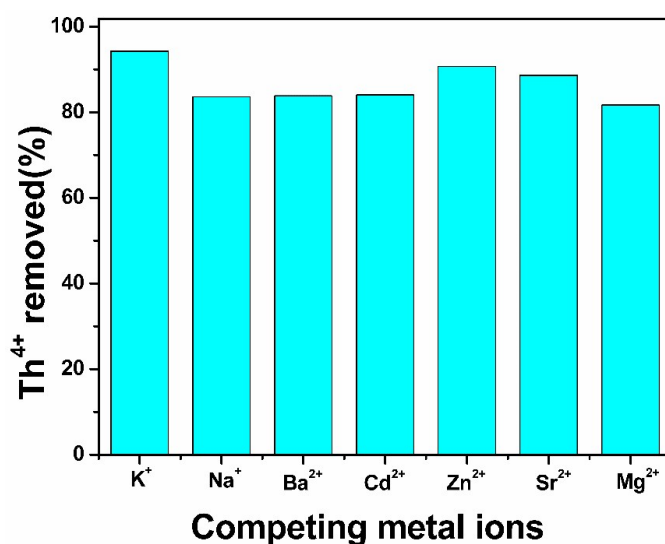

**Figure S9.** Adsorption ratio of Th<sup>4+</sup> in  $2.15 \times 10^{-5}$  mol/L competing metal ions.

**Table S3.** Quenching constants ( $K_{SV}$ ) of various  $1 \times 10^{-3}$  mol/L  $M(\text{NO}_3)_x \cdot n(\text{H}_2\text{O})$  ( $M = \text{K}^+, \text{Na}^+, \text{Ba}^{2+}, \text{Sr}^{2+}, \text{Cd}^{2+}, \text{Ca}^{2+}, \text{Co}^{2+}, \text{Zn}^{2+}, \text{Mg}^{2+}, \text{La}^{3+}, \text{Lu}^{3+}, \text{Th}^{4+}$ ;  $x = 1, 2, 3, 4$ ) solution, and  $\text{Na}_m(\text{X}) \cdot y(\text{H}_2\text{O})$ . ( $\text{X} = \text{BO}_2^-, \text{PO}_4^{3-}, \text{SO}_4^{2-}, \text{Cl}^-, \text{F}^-$ ;  $m = 1, 2, 3$ ).



|                 |                  |                               |                               |                  |                        |                              |
|-----------------|------------------|-------------------------------|-------------------------------|------------------|------------------------|------------------------------|
| Sample          | Blank            | K <sup>+</sup>                | Na <sup>+</sup>               | Ba <sup>2+</sup> | Sr <sup>2+</sup>       | Cd <sup>2+</sup>             |
| K <sub>SV</sub> | 0                | 124.90                        | 197.81                        | 150.36           | 156.91                 | 88.75                        |
| Sample          | Zn <sup>2+</sup> | Mg <sup>2+</sup>              | La <sup>3+</sup>              | Lu <sup>3+</sup> | Th <sup>4+</sup>       | BO <sub>2</sub> <sup>-</sup> |
| K <sub>SV</sub> | 119.59           | 110.85                        | 391.01                        | 418.74           | 6.68 × 10 <sup>4</sup> | -298.67                      |
| Sample          | Ca <sup>2+</sup> | PO <sub>4</sub> <sup>3-</sup> | SO <sub>4</sub> <sup>2-</sup> | Cl <sup>-</sup>  | F <sup>-</sup>         | Co <sup>2+</sup>             |
| K <sub>SV</sub> | 0.08             | -0.13                         | 41.73                         | -32.63           | 61.94                  | 351.38                       |
